# Supplementary material for: Identification and validation of obesity related genes signature based on microenvironment phenotypes in prostate adenocarcinoma
Source: publisher site journal article supplement (doi:10.18632/aging.205065), 2023-10-02
Supplement: Supplementary file [file aging-v15i19-205065-supplementary-material-SD2.pdf]

## SUPPLEMENTARY TABLES

**Supplementary Table 1.  
ORGs were summarized  
in this study.**

---

LEP  
LEPR  
MC4R  
POMC  
PCSK1  
ADCY3  
SIM1  
BDNF  
NEGR  
TCF7L2  
IRS1  
FTO  
RPTOR  
MAP2K5  
NPY  
SLC6A4  
MCHR1  
ADIPOQ  
LPL  
PPARG  
IGF2/H19  
HSD2  
GR  
SREBF1  
ABCA1  
TNFA  
CD36  
PHGDH  
TOMM20  
ABCG1  
PHOSPHO1  
PER3  
HIF3A  
TXNIP  
PEG3  
LY86  
ADRB3

---

**Supplementary Table 2. The primers for q-PCR in this study.**

|    | <b>Primer</b> | <b>Sequence (5' to 3')</b> |
|----|---------------|----------------------------|
| 1  | LPL For       | TCATTCCCGGAGTAGCAGAGT      |
| 2  | LPL REV       | GGCCACAAGTTTTGGCACC        |
| 3  | CEP290 For    | AGATGCTCACCGAACAAGTAGA     |
| 4  | CEP290 REV    | ATGAGTCTGTTGAGAAAGGGTTG    |
| 5  | TMEM67 For    | CTTGGCTGTTTTATGGAGACCA     |
| 6  | TMEM67 REV    | ACCTCCTTCTAAAGTTTGCCAC     |
| 7  | ADCY3 For     | TTCTCCGAGCCCGAATACTC       |
| 8  | ADCY3 REV     | GACTCCGGCACGAAAGTCA        |
| 9  | NR3C1 For     | ACAGCATCCCTTTCTCAACAG      |
| 10 | NR3C1 REV     | AGATCCTTGGCACCTATTCCAAT    |
| 11 | CPE For       | CATCTCCTTCGAGTACCACCG      |
| 12 | CPE REV       | CCGTGTAAATCCTGCTGATGG      |
| 13 | PCSK1 For     | CTGGATGGCATTGTGACGGAT      |
| 14 | PCSK1 REV     | GCCCCAGCTTGCACTGTAAA       |
| 15 | LRP2 For      | G TTCAGATGACGCGGATGAAA     |
| 16 | LRP2 REV      | TCACAGTCTTGATCTTGGTCACA    |
| 17 | SLC6A14 For   | ACCGTGGTAACTGGTCCAAAA      |
| 18 | SLC6A14 REV   | CGCCTCCACCATTGCTGTAG       |
